# Supplementary material
Source: MDPI journal article supplement (https://www.mdpi.com/2673-9976/18/1/57)
Supplement: s1 [file s1]

## Chlorogenic acids profile of *Coffea arabica* by-products (cascara and silverskin): a comparison with green and roasted beans

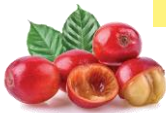

Marlene Machado<sup>1\*</sup>, Susana Machado<sup>1</sup>, Helena Ferreira<sup>2</sup>, M. Beatriz P. P. Oliveira<sup>1</sup>, Rita C. Alves<sup>1\*</sup>

<sup>1</sup>REQUIMTE/ LAQV, Department of Chemical Sciences, Faculty of Pharmacy, University of Porto, Porto, Portugal;

<sup>2</sup>REQUIMTE/UCIBIO, Lab. of Microbiology, Dep. Biological Sciences, Fac. Pharmacy, University of Porto, Porto, Portugal;

\*marlenemachado753@gmail.com; rcalves@ff.up.pt

### Introduction

Coffee, one of the most traded commodities in the world, contains several compounds with health-promoting properties [1,2]. The presence of chlorogenic acids (CGA) is not only responsible for its bitter and astringent taste, but also for its anti-inflammatory, antitumoral, and antioxidant effects [1,2]. However, coffee production generates huge quantities of by-products that have a negative impact on the environment if they are not treated [3]. Cascara and silverskin are the primary by-products of coffee cherries pulping and green coffee roasting, respectively [3]. In this work, the CGA profile of these two coffee by-products were studied and compared with those of coffee beans (green and roasted), aiming a possible valorization in a circular economy context.

### Methodology

0.4 g (roasted and green beans) or 1.2 g (silverskin and cascara) of sample

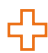

40 ml of ethanol: water (1:1)

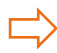

Agitation Multi Reax 30 min, 2000 rpm

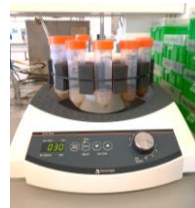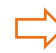

Centrifugation 10 min, 4500g

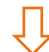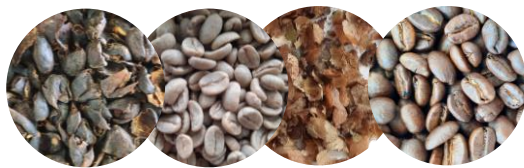

The samples were all of *Coffea arabica* from Colombia. Before solid-liquid extraction, the samples were milled.

The supernatants were analysed by RP-HPLC-DAD. The CGA were identified by comparing their retention times with those of known standards

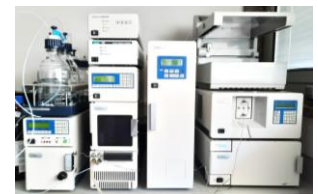

### Results and discussion

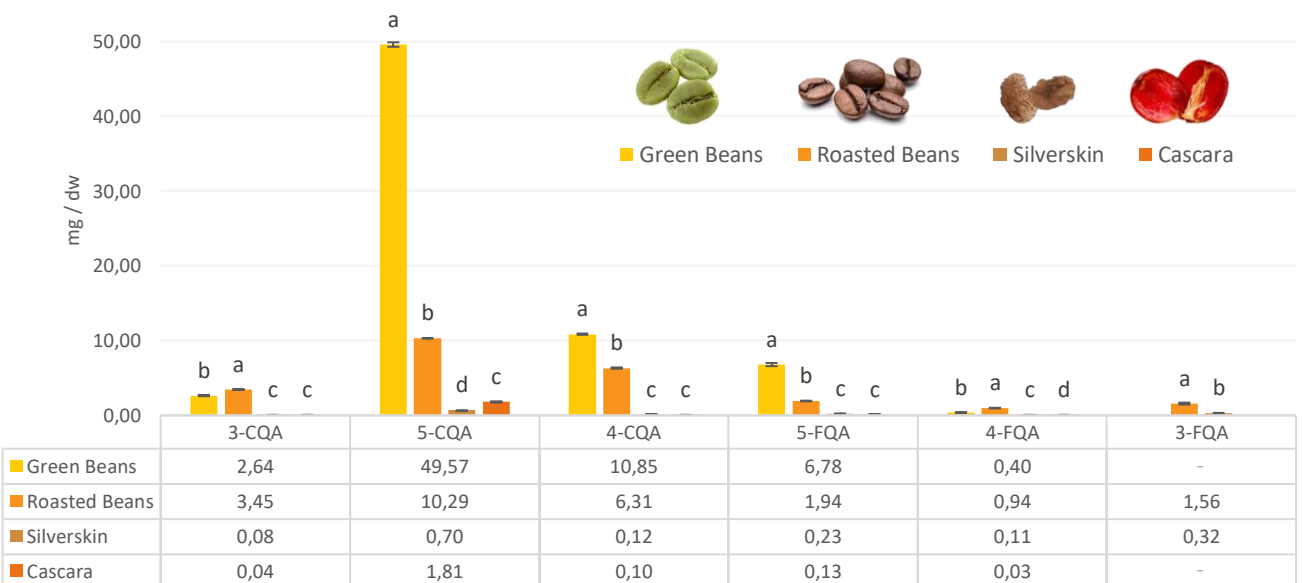

**Figure 1** Chlorogenic acid content (mg/g dry weight) in coffee beans (green and roasted), cascara and silverskin (mean  $\pm$  standard deviation, n =3). CQA, caffeoylquinic acid; FQA, feruloylquinic acid. Different letters indicate significant differences between groups ( $p < 0.05$ )

The results show that these coffee by-products have a significantly lower CGA content than green or roasted beans. In all samples, the predominant CGA was the 5-CQA. Cascara contained the highest concentration of 5-CQA among the by-products ( $1.11 \pm 0.07$  mg/g dw), while green beans presented the highest amount ( $49.57 \pm 0.27$  mg/g dw). In fact, roasted beans and silverskin are roasted at high temperatures, rendering CQAs susceptible to degradation, transesterification, isomerization, and conversion into lactones [5]. When compared to green beans, the 5-CQA content of roasted beans was nearly five times lower ( $10.29 \pm 0.07$  mg/g dw). FQA are present in smaller amounts, with the highest concentration found in green beans ( $6.78 \pm 0.27$  mg/g dw for 5-FQA).

### Conclusion

To conclude, while cascara and silverskin contain less CGA than coffee beans, they can still be considered a source of these high-value compounds. CGA in by-products could be recovered and used to improve the functionality of foods as well as in the pharmaceutical industry.

**References:** [1] Bondam, A. F. et al. Trends Food Sci., 123, (2022), 172-186. [2] Rojas-Gonzalez, A. et al. Molecules, 27 (11), (2022), 3400. [3] Zhang, J. et al. Foods, 11 (12), (2022), 1710. [4] Puga, H. et al. J. Clean. Prod., 168, (2017), 14-21. [5] Peixoto, J.A.B. et al. Foods, 11 (12), (2022), 1671.

**Acknowledgments:** To FCT/MCTES for the projects PTDC/SAU-NUT/2165/2021 (COBY4HEALTH - Can coffee by-products decrease the risk of metabolic syndrome? A comprehensive approach to reduce waste and valorize health benefits) and UIDB/50006/2020. This work was also supported by AgriFood XXI I&D&I project (NORTE-01-0145-FEDER-000041) cofinanced by ERDF, through the NORTE 2020. M. M. and R. A. are grateful to FCT for the PhD grant 2021.04907.BD and the CEECIND/01120/2017 contract, respectively.
